# Supplementary figures and images for: Measurements of damage and repair of binary health attributes in aging mice and humans reveal that robustness and resilience decrease with age, operate over broad timescales, and are affected differently by interventions
Source: eLife journal article supplement (doi:10.7554/elife.77632), 2022-11-21

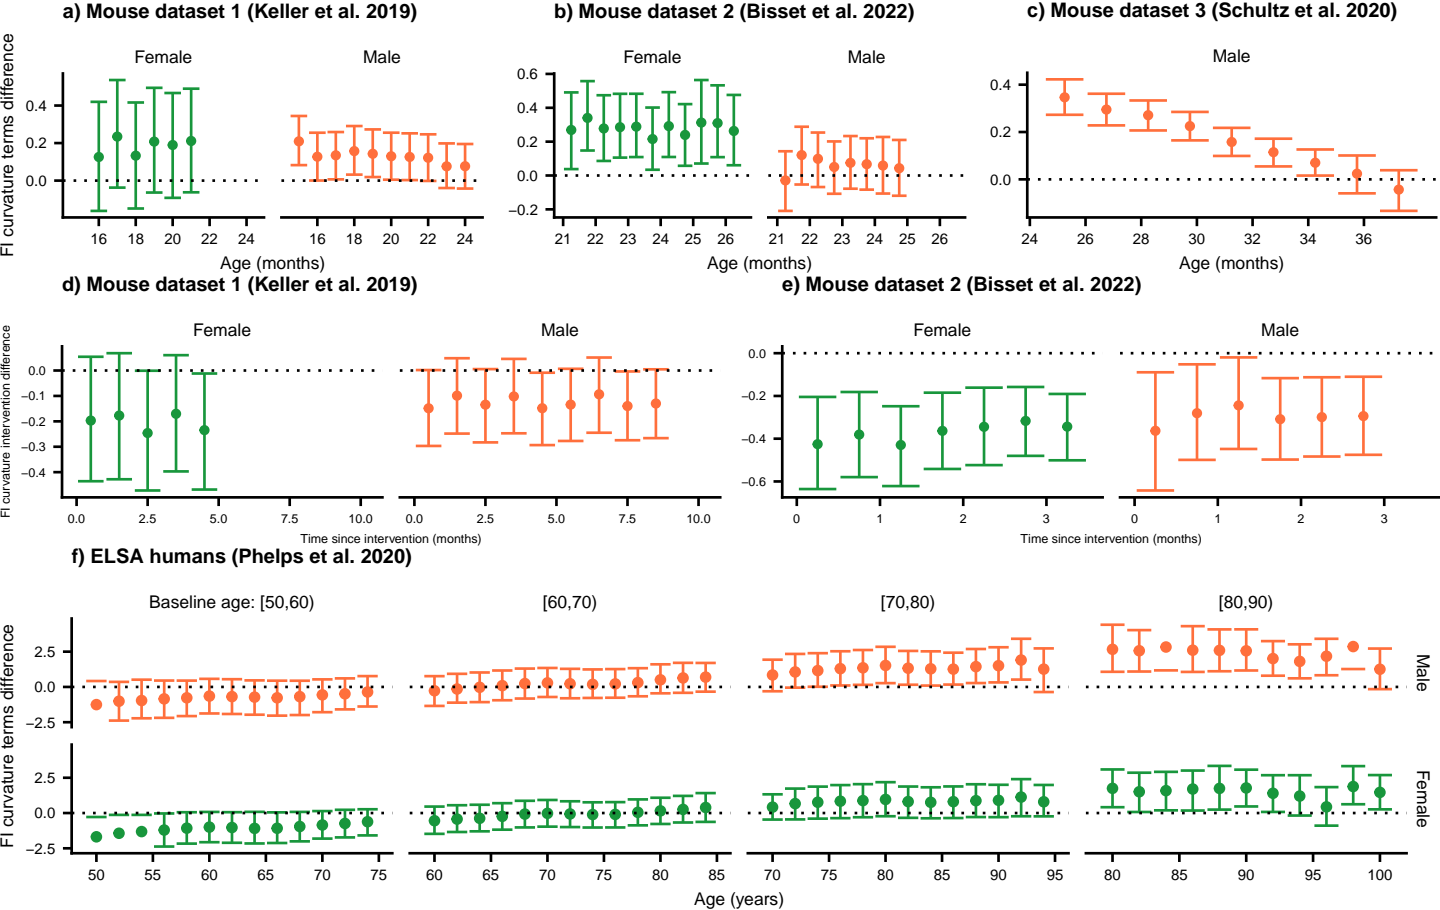

Supplement: supp [file elife-77632-supp-v1.zip › elife_poa_e77632_Figure_3_figure_supplement_1.pdf]

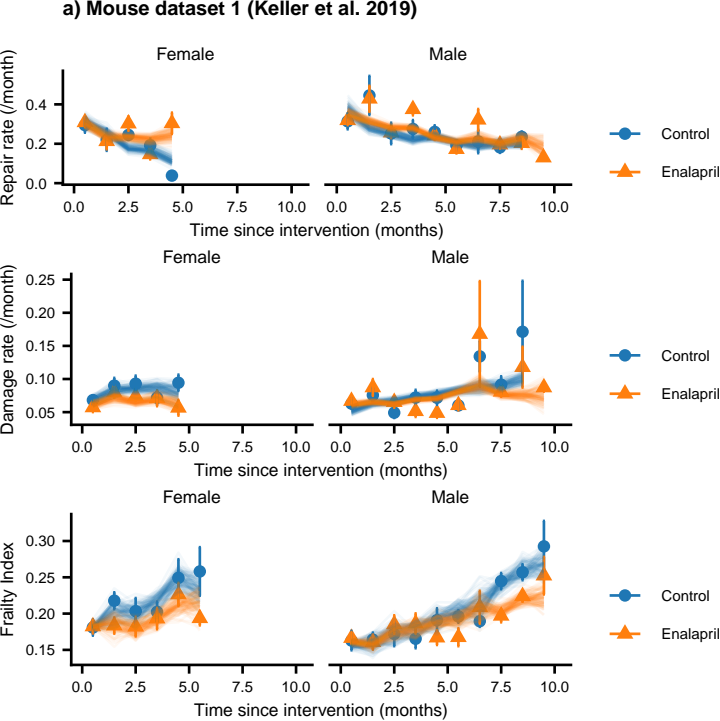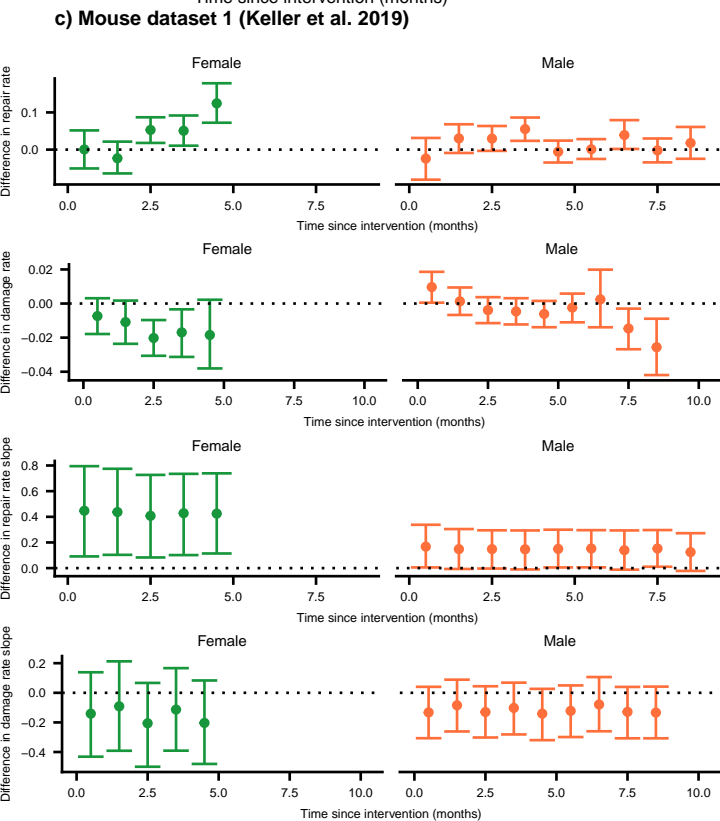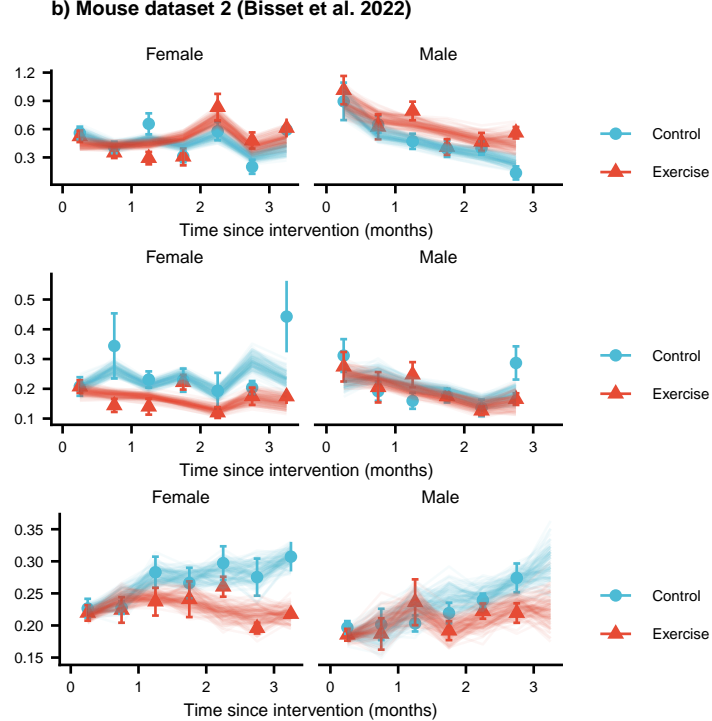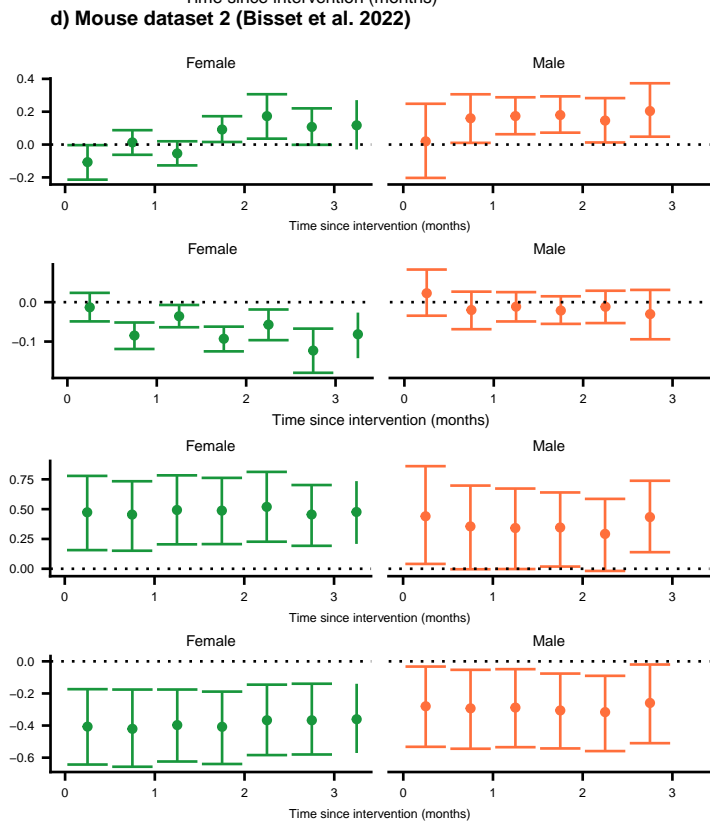

Supplement: supp [file elife-77632-supp-v1.zip › elife_poa_e77632_Figure_4_figure_supplement_1.pdf]

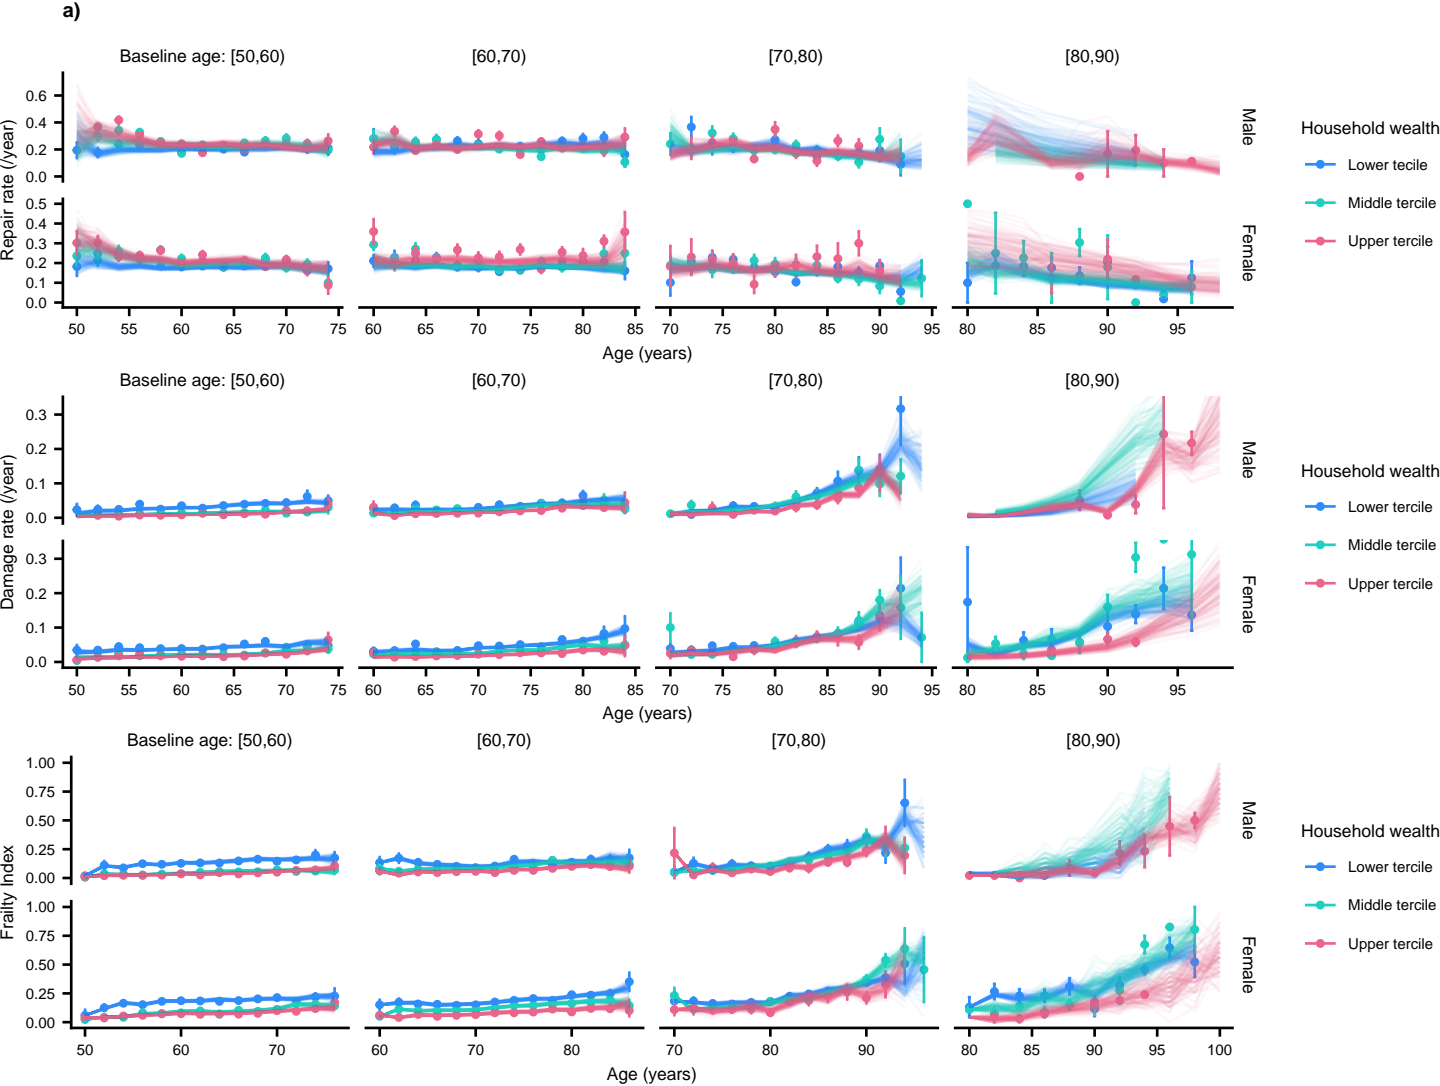

Supplement: supp [file elife-77632-supp-v1.zip › elife_poa_e77632_Figure_4_figure_supplement_2.pdf]

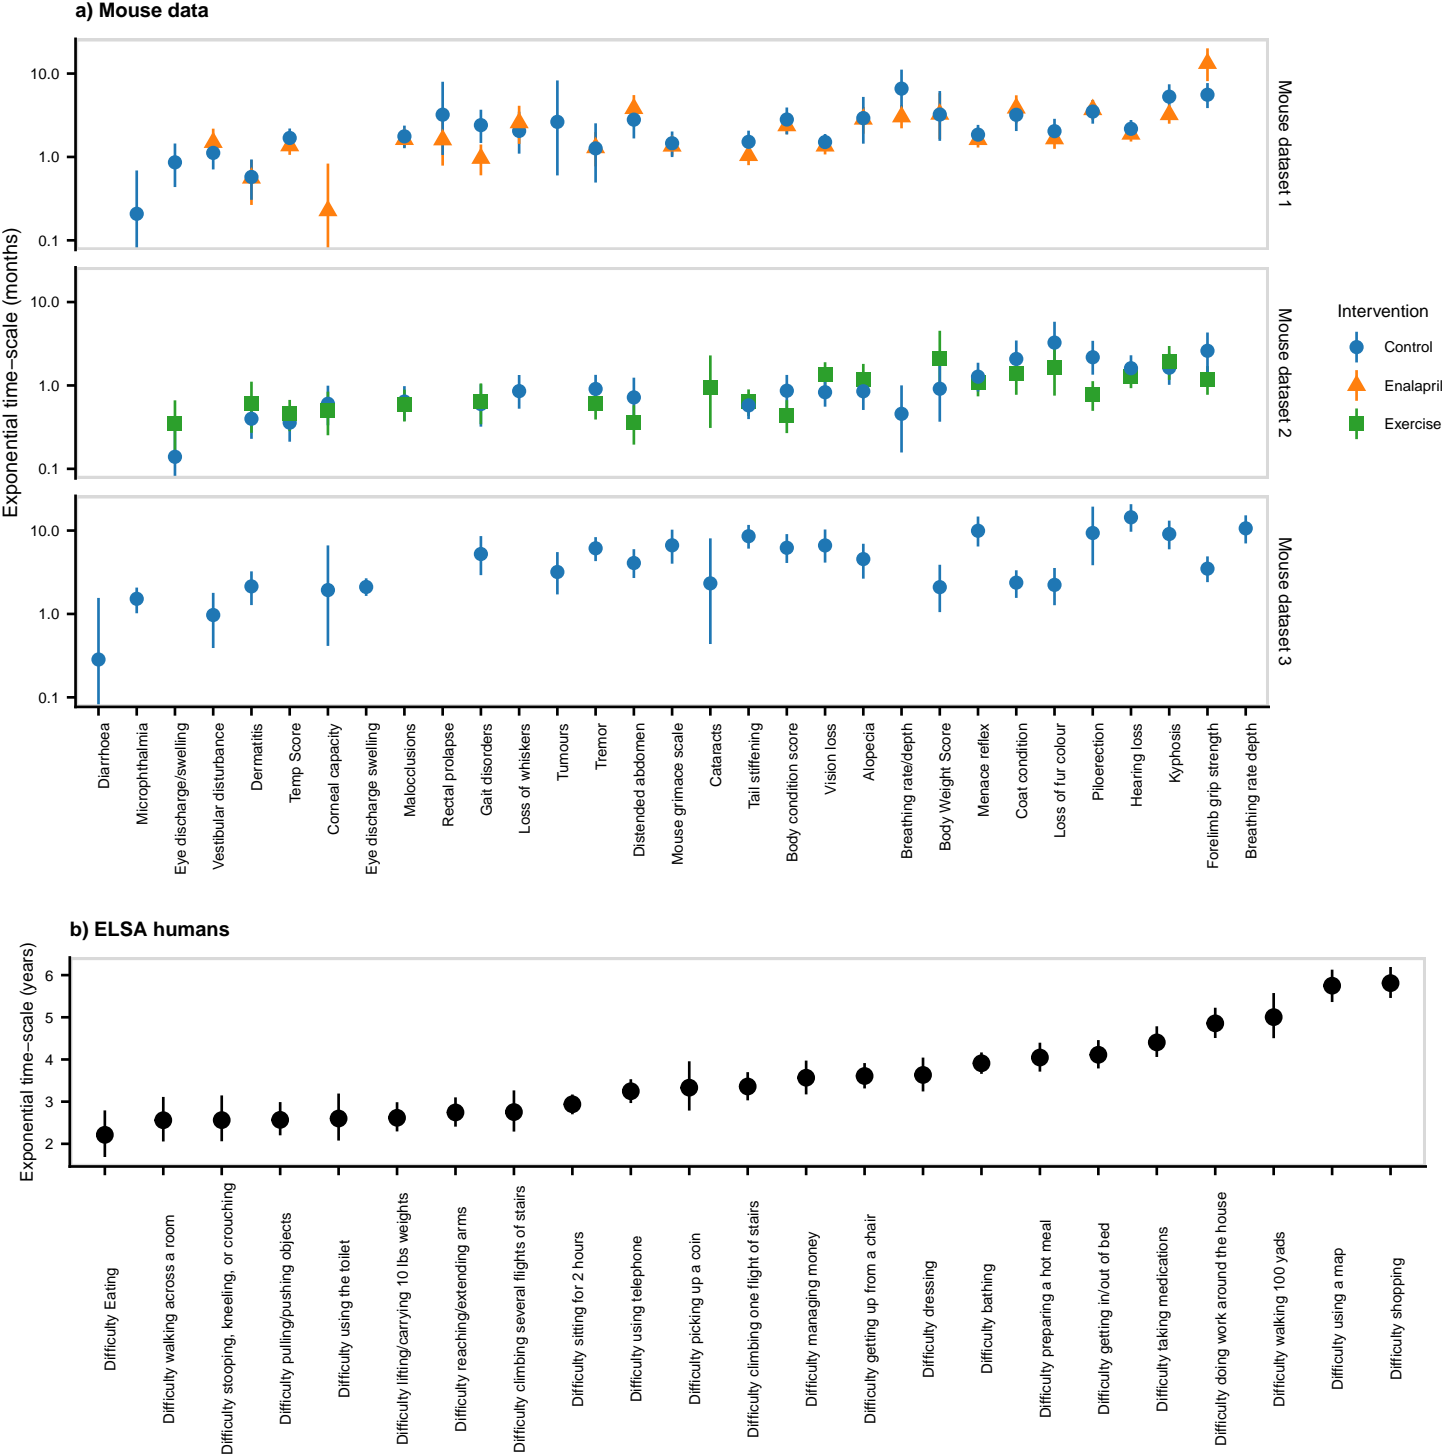

Supplement: supp [file elife-77632-supp-v1.zip › elife_poa_e77632_Figure_5_figure_supplement_1.pdf]

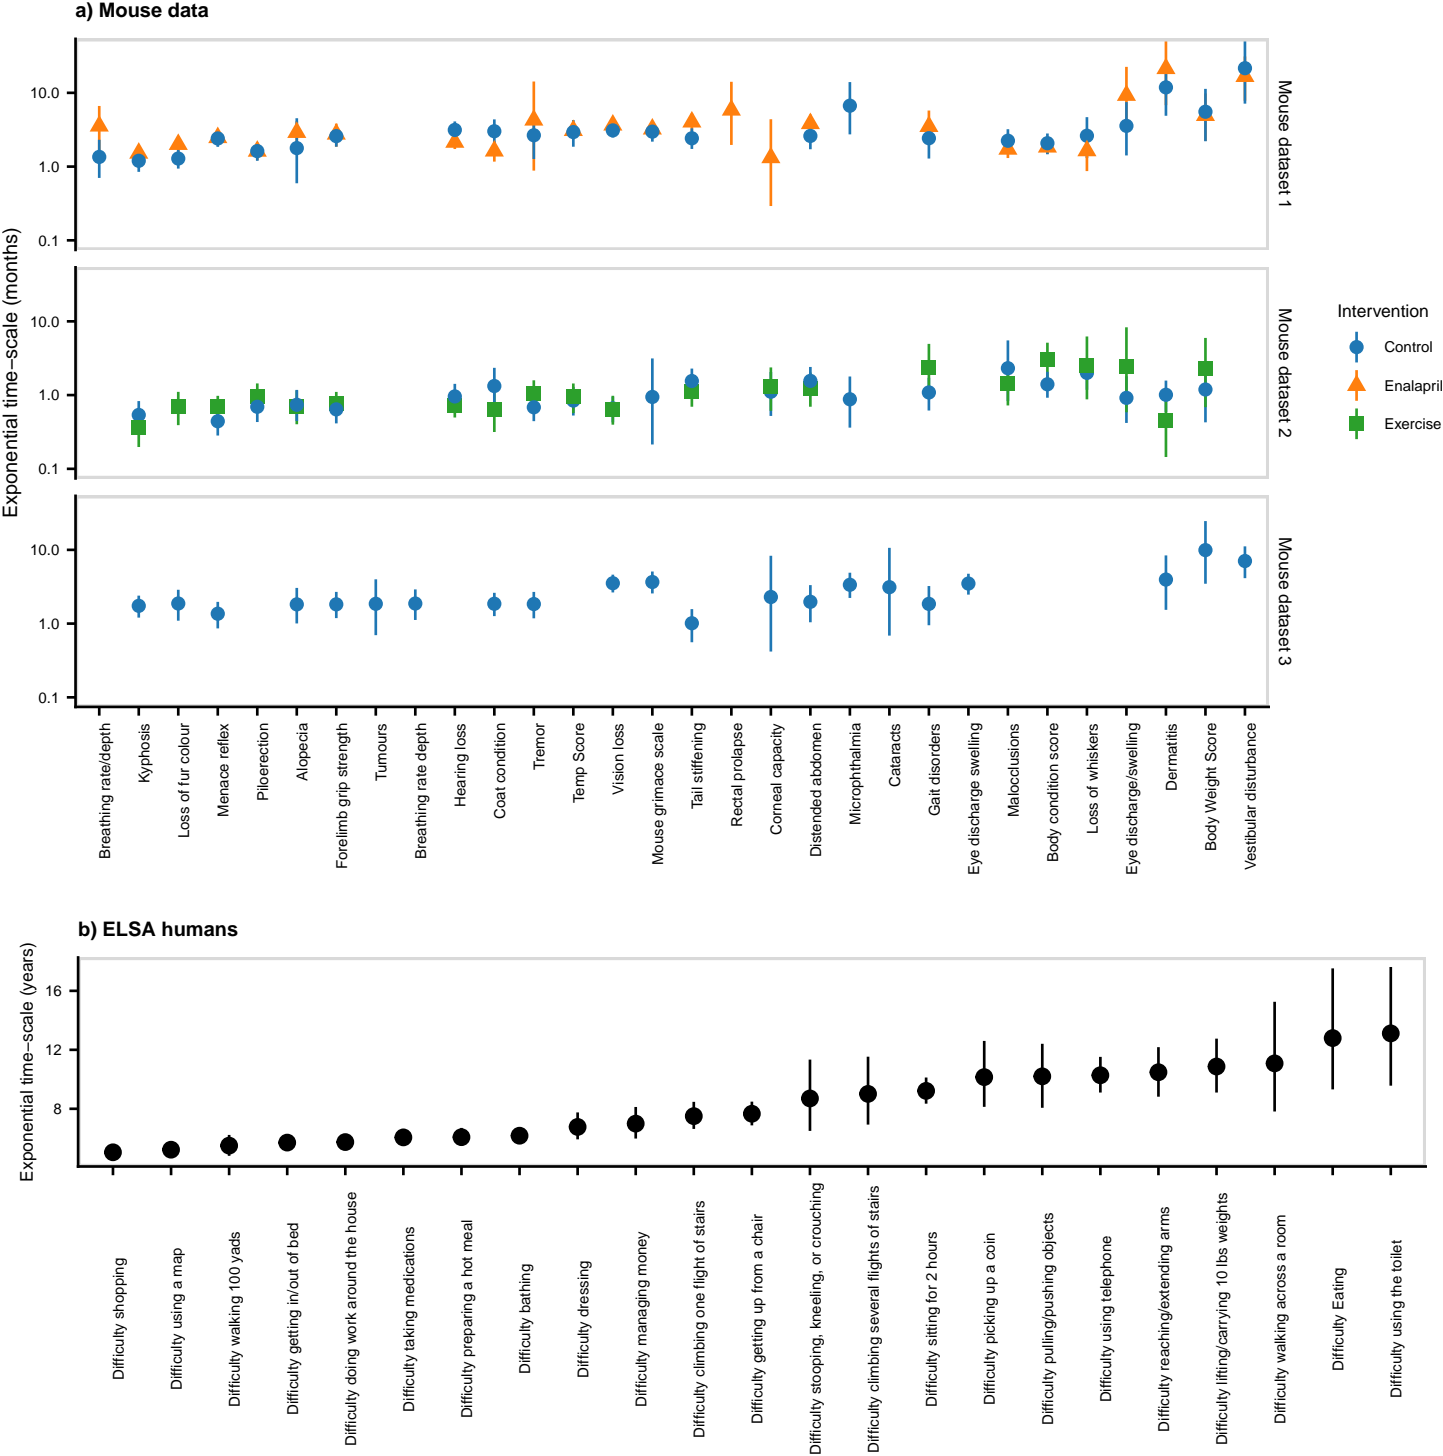

Supplement: supp [file elife-77632-supp-v1.zip › elife_poa_e77632_Figure_5_figure_supplement_2.pdf]

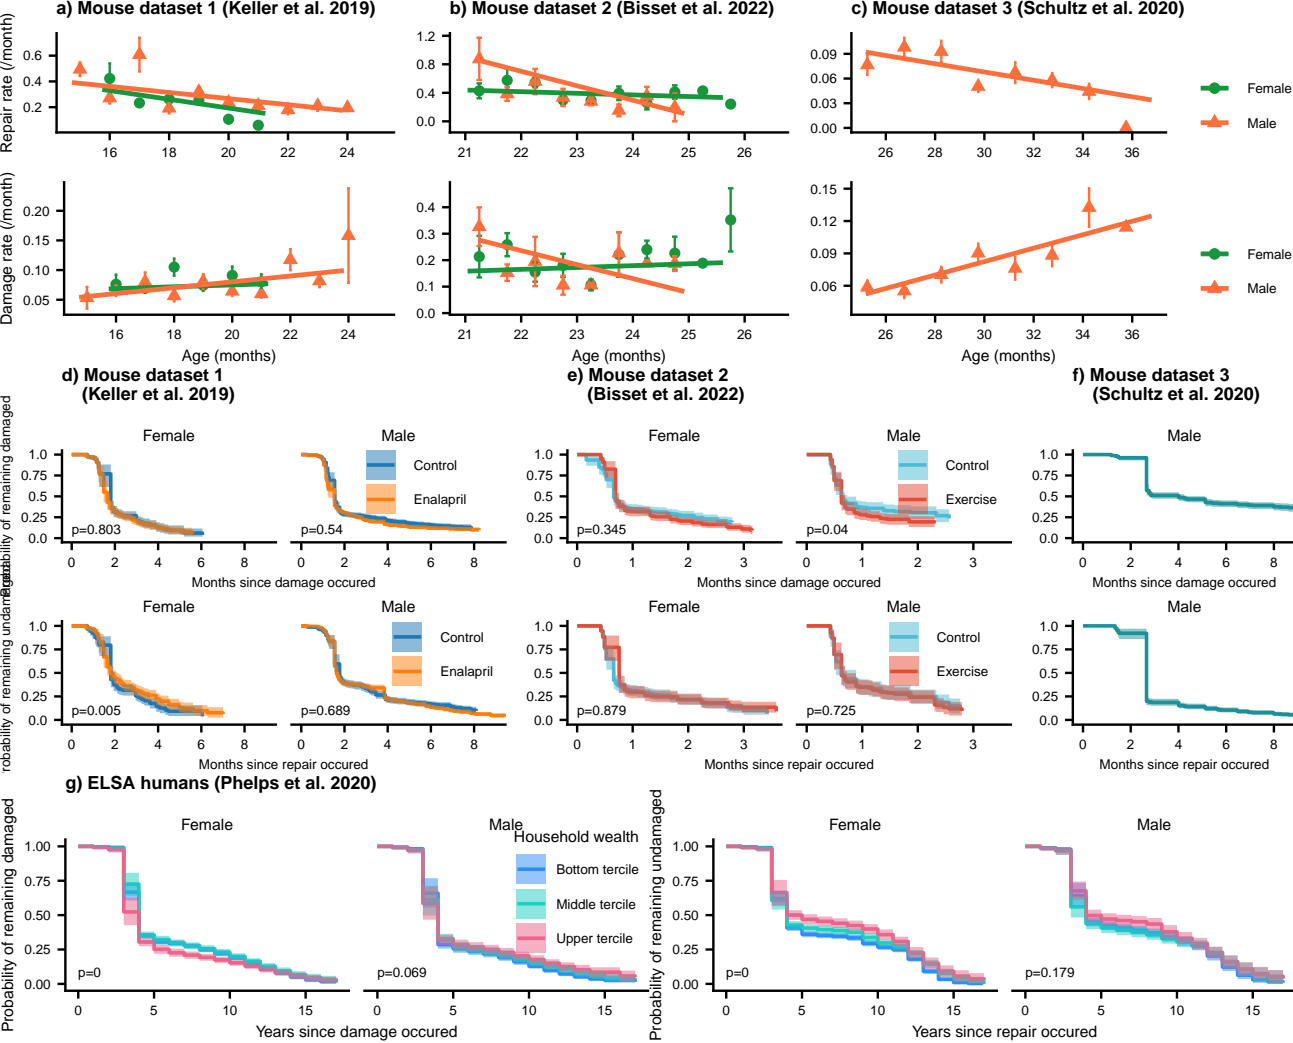

Supplement: supp [file elife-77632-supp-v1.zip › elife_poa_e77632_Figure_5_figure_supplement_3.pdf]
